# Supplementary material for: ‘A silent epidemic of grief’: a survey of bereavement care provision in the UK and Ireland during the COVID-19 pandemic
Source: PubMed Central journal article supplement — BMJ Open. 2021 Mar 3;11(3):e046872. doi: 10.1136/bmjopen-2020-046872 (PMC7931210; doi:10.1136/bmjopen-2020-046872), 2021-03-03
Supplement: bmjopen-2020-046872supp001.pdf [file bmjopen-2020-046872supp001.pdf]

**Online Appendix. Text of the online survey****Bereavement care during the COVID-19 pandemic**

The current COVID-19 pandemic has been a particularly difficult time for people experiencing bereavement and has changed the ways in which professionals are seeking to support them. In order to help each other in our care of bereaved people at this difficult time, we have developed a brief questionnaire which will take less than five minutes to complete.

We would be grateful if you could complete this in the near future (closing date Friday September 4<sup>th</sup>) so that we can analyse and circulate the results as soon as possible. We will send the results by email to everyone who responds and aim to publish a journal paper in the near future.

Please feel free to forward the survey link to your colleagues: it would be helpful to have a good number of responses from across the UK.

There are no right or wrong answers. We look forward to hearing from you.

Stephen and Caroline

Prof. Stephen Barclay [sigb2@medschl.cam.ac.uk](mailto:sigb2@medschl.cam.ac.uk) and Dr Caroline Pearce [cmp89@medschl.cam.ac.uk](mailto:cmp89@medschl.cam.ac.uk)

This research aims to identify the changes in the ways that professionals are providing bereavement support during the pandemic. It is funded by the NIHR School for Primary Care Research and has been reviewed by the University of Cambridge Psychology Research Ethics Committee. By responding to this survey, you consent to take part in this study: you can withdraw at any time by closing the survey without pressing the final "submit" button. Any participant identifiable data will be stored in a University secure data hosting server and destroyed after 12 months: all anonymised data will be stored for ten years on university password-protected computers. For general information about how our University uses personal data, please see: <https://www.information-compliance.admin.cam.ac.uk/data-protection/research-participant-data>

If you have any questions about the study please contact Prof. Stephen Barclay [sigb2@medschl.cam.ac.uk](mailto:sigb2@medschl.cam.ac.uk)

|                                                                                            |                                                                                                                                                                                                                                                                                                                                                                                                                              |
|--------------------------------------------------------------------------------------------|------------------------------------------------------------------------------------------------------------------------------------------------------------------------------------------------------------------------------------------------------------------------------------------------------------------------------------------------------------------------------------------------------------------------------|
| Q1 - In what area of the country do you work?<br>(tick one box)                            | East of England<br>Greater London<br>Midlands<br>North East<br>North West<br>South East<br>South West<br>Scotland<br>Wales<br>Ireland<br>Other (please specify)                                                                                                                                                                                                                                                              |
| Q2 - What is your current professional role? (Tick one box)                                | General Practitioner<br>Community Nurse<br>Bereavement Counsellor<br>Bereavement support worker / volunteer<br>Chaplain<br>Funeral Director<br>Social Worker<br>Care Home Manager<br>Social Care Worker<br>Clinical Psychologist<br>Palliative Medicine doctor<br>Palliative Care Specialist Nurse<br>Other (please specify)                                                                                                 |
| Q3 - In what setting(s) do you work? (Tick as many as apply)                               | Care Home<br>Community<br>Hospice<br>Hospital<br>Other (please specify)                                                                                                                                                                                                                                                                                                                                                      |
| Q4 - In what aspects of care for bereaved people are you involved? (Tick as many as apply) | Providing support immediately after a death<br>Practical arrangements of certificates and funerals<br>Providing information on support services<br>Emotional support and listening<br>Clinical assessment of support needs<br>Bereavement counselling<br>Referring for specialist support<br>Provision of specialist psychological / psychiatric support<br>Prescribing medication<br>Pre-bereavement support prior to death |

## Online Appendix. Text of the online survey

---

|                                                                                                                                                                                                                                                                                                                                                                                        | Other (please specify)                                                                                                                                                                                                                                                                                                                                                                                                          |
|----------------------------------------------------------------------------------------------------------------------------------------------------------------------------------------------------------------------------------------------------------------------------------------------------------------------------------------------------------------------------------------|---------------------------------------------------------------------------------------------------------------------------------------------------------------------------------------------------------------------------------------------------------------------------------------------------------------------------------------------------------------------------------------------------------------------------------|
| <p>Q5 - In the light of the COVID-19 pandemic, have you made changes in the ways you care for the bereaved and / or have there been adaptations to services in your locality regarding:</p> <p>Please click on one of the Yes / No / Unsure buttons to the right of each issue.</p> <p>Please provide details of change or other comments (Free text box for replies)</p>              | <p>Identifying bereaved people who might need support</p> <p>Restrictions regarding funeral arrangements</p> <p>Supporting people bereaved from COVID</p> <p>Supporting people bereaved from non-COVID conditions</p> <p>Supporting people bereaved before the pandemic</p> <p>Managing complex forms of grief</p> <p>Use of telephone, video or other remote support</p> <p>Access to specialist services for the bereaved</p> |
| <hr/>                                                                                                                                                                                                                                                                                                                                                                                  |                                                                                                                                                                                                                                                                                                                                                                                                                                 |
| <p>Q6 - Do you have any further comments on supporting bereaved people during the COVID-19 pandemic? (Free text box for replies)</p>                                                                                                                                                                                                                                                   |                                                                                                                                                                                                                                                                                                                                                                                                                                 |
| <hr/>                                                                                                                                                                                                                                                                                                                                                                                  |                                                                                                                                                                                                                                                                                                                                                                                                                                 |
| <p>Q7 - Further research 1.</p> <p>We are planning a further study in which we would like to talk with some recently bereaved people through telephone interviews. If you would be interested in approaching people for that research, please give your contact details and we will get back in touch with you:</p> <p>Name <input type="text"/> Email <input type="text"/></p>        |                                                                                                                                                                                                                                                                                                                                                                                                                                 |
| <p>Q8 - Further research 2.</p> <p>Colleagues in Bristol and Cardiff are undertaking a more detailed survey of bereavement service provision during the pandemic. If you might be interested in taking part in their research, please give your contact details below and we will forward information about that study</p> <p>Name <input type="text"/> Email <input type="text"/></p> |                                                                                                                                                                                                                                                                                                                                                                                                                                 |
| <p>Thank you for completing this survey.</p> <p>Please forward the link to your colleagues and others who might be interested in taking part.</p>                                                                                                                                                                                                                                      |                                                                                                                                                                                                                                                                                                                                                                                                                                 |

---
